# Supplementary material
Source: ML conference proceedings conference paper supplement (https://openaccess.thecvf.com/content/CVPR2023/html/Le_Music-Driven_Group_Choreography_CVPR_2023_paper.html)
Supplement: Supplementary file 1 [file Le_Music-Driven_Group_Choreography_CVPR_2023_supplemental.zip]

Archive with 2 entries (2 files):
- 5880-supp.pdf
- 5880-supp.mp4
